# Supplementary material for: Tracing subducted oceanic slabs in the mantle by using molybdenum isotopes: A case study of intraplate basalts from the Northeast China
Source: Copernicus journal article supplement (doi:10.5194/egusphere-2022-1169), 2023-03-09
Supplement: Supplementary file 1 [file Supplementary Material.xlsx]

## Sheet: Table s1
	DYS12-01	DYS12-02	DZS12-02	DZS12-03	HS12-01	HS12-03
Major element(wt.%)
SiO2	45.06	45.08	51.58	51.76	51.85	51.62
TiO2	2.34	2.33	2.06	2.05	2.1	2.2
Al2O3	11.76	11.77	12.67	12.67	13.28	13.3
TFe2O3	10.28	10.27	8.57	8.49	8.07	8.44
MnO	0.15	0.15	0.12	0.12	0.11	0.11
MgO	7.93	7.89	11.43	11.62	12.13	12.05
CaO	9.1	9.05	5.32	5.35	5.1	5.48
Na2O	3.63	3.52	3.62	3.74	3.42	3.51
K2O	4.49	4.46	4.77	4.94	5.52	4.61
P2O5	0.93	0.93	0.86	0.85	0.89	0.89
LOI	0.86	0.75	0.08	0.06	0.12	0.06
Total	99.6	99.26	99.99	99.8	99.21	99.82
Trace element(ppm)
Sc	20.8	21.1	12.1	11.8	11.8	12.2
Cr	406	390	448	446	309	362
Ni	217	221	341	317	238	221
Cu	39.6	38.1	24.8	23.8	23.8	15.1
Zn	104	105	110	109	118	115
Rb	93	92.1	101	103	113	106
Sr	1339	1371	1304	1286	1403	1371
Y	21	21.4	17.7	17.5	20.2	19.1
Zr	286	290	462	463	569	499
Nb	65.6	67.1	59.1	58.8	73.7	63.3
Ba	1178.94	1459.6	1981.71	1828.73	2311.5	1785.96
La	88.8546	104.937	78.8405	84.1599	75.4316	70.1061
Ce	115.238	128.947	146	120	80.6667	76.6667
Pr	18.8	18.9	17.5	17.4	21	18.8
Nd	66	66.6	60.9	60.4	71.1	65.2
Sm	11.9	12.1	10.9	10.9	12.4	11.7
Eu	2.96	3	2.67	2.61	2.99	2.88
Gd	9	9.14	7.99	7.97	9.08	8.62
Tb	1.1	1.13	0.974	0.964	1.1	1.06
Dy	5.06	5.27	4.47	4.32	5.18	4.94
Ho	0.882	0.92	0.728	0.735	0.867	0.811
Er	2.07	2.12	1.67	1.68	1.95	1.85
Tm	0.262	0.269	0.218	0.217	0.25	0.233
Yb	1.44	1.58	1.25	1.25	1.41	1.24
Lu	0.202	0.218	0.165	0.173	0.193	0.163
Hf	7.35	7.64	12.1	12	15	13.1
Ta	3.92	4.06	3.33	3.29	4.15	3.63
Pb	10.621	13.1177	8.31435	7.07965	5.22558	3.7674
Th	8.02	8.31	8.73	8.21	11.5	9.02
U	1.62348	1.65868	1.58152	1.66567	1.81962	1.47386
