# Supplementary material for: Tracing subducted oceanic slabs in the mantle by using molybdenum isotopes: A case study of intraplate basalts from the Northeast China
Source: Copernicus journal article supplement (doi:10.5194/egusphere-2022-1169), 2023-03-09
Supplement: Supplementary file [file egusphere-2022-1169-RC1-supplement.pdf]

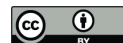

1       **Tracing subducted oceanic slabs in the mantle by**  
2               **using molybdenum isotopes: A case study of**  
3               **intraplate basalts from the Northeast China**

4  
5       Qiugen Zheng<sup>A</sup>, Qifang Zheng<sup>B\*</sup>, Yi Zhang<sup>C\*</sup>, Guangyu He<sup>D</sup>, Qian Wang<sup>D</sup>, Jane Fitton<sup>E</sup>

6       A. School of Ocean Sciences, China University of Geosciences (Beijing), Beijing,  
7       China, 100083

8       B. School of Earth Sciences and Resources, China University of Geosciences (Beijing),  
9       Beijing, China, 100083

10      C. School of Earth Sciences, ZheJiang University, Hangzhou, China, 310058

11      D. State Key Laboratory of Isotope Geochemistry, Guangzhou Institute of Geochemistry,  
12      Chinese Academy of Sciences, Guangzhou, China, 510630

13      E. Dept of Earth Sciences, University of Oxford, South Parks Road, Oxford OX1 3AN, UK

14

15

16      \* Corresponding author:

17      Qifang Zheng and Yi Zhang

18      E-mail: [xiaoyi\\_tu2021@163.com](mailto:xiaoyi_tu2021@163.com)

19      [zhangyi920407@163.com](mailto:zhangyi920407@163.com)

20

21

22

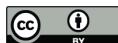

23 **Abstract**

24 Determining **subducted** processes is very important for understanding lithological  
25 heterogeneity because substantial quantities of slabs are recycled into the mantle. Molybdenum  
26 isotopes have been used to distinguish sources materials because of the significant Mo isotopic  
27 differences between the crust and the mantle. Here, we undertake a systematic Mo isotopic  
28 investigation on a suite of well-characterized continental basalts from Keluo and Halaha-  
29 Chaoer, located in Northeast China.  $\delta^{98}\text{Mo}$  of Keluo **varied** from -0.41 to -0.23‰ with an  
30 average of -0.34‰, and samples from Halaha-Chaoer ranged in  $\delta^{98}\text{Mo}$  from -0.18 to -0.12‰  
31 with an average of -0.15‰. The former is lighter than the mean value of fresh oceanic basalts  
32 (-0.21‰), while the latter is similar to oceanic basalts. Combined with other geochemical  
33 indications (LOI, Ce/Pb, La/Yb and so on), the Mo isotopic variations cannot be **interrupted** by  
34 chemical weathering, continental crust contamination, or magmatic processes. The  $\delta^{98}\text{Mo}$   
35 variation in this study is explained by adding various oceanic crustal materials in magma  
36 sources. The relationships of  $\delta^{98}\text{Mo}$  with Ba/Th, Th/U,  $^{143}\text{Nd}/^{144}\text{Nd}$  for the samples indicated  
37 that sediment and altered oceanic crust have contributed to the significant variations in these  
38 samples. This study indicates the great potential of Mo isotopes to distinguish different types  
39 of recycled oceanic crust materials in the mantle.

40

41

42 Keywords: Molybdenum isotopes; Subducted oceanic slabs; Intraplate basalts; Northeast China

43



## 44 1. Introduction

45 Slab subduction is widely considered to be the primary mechanism for element cycling between  
46 the crust and mantle (Hofmann, 1997; Stracke et al., 2003). The recycled materials with slabs  
47 subduction are used to either generate the magmas in the subduction zone or form different  
48 reservoirs, such as enriched mantle component I (EM I) and enriched mantle component II (EM  
49 II) (Zindler and Hart, 1986). Previous investigations suggested that the oceanic crust account  
50 for ~10% of the total mass of the mantle since the starting of subducted processes (Stracke et  
51 al., 2003; Tang et al., 2016). The converted approach took varied materials into mantle and led  
52 to lithological heterogeneity in the upper mantle (Perfit et al., 1980; Plank and Langmuir, 1998;  
53 Castillo et al., 2000). Therefore, distinguishing the contribution of subducted materials was  
54 required for understanding the lithological heterogeneity.

55 The previous works observed that the mobility of Mo could be negligible in the subduction  
56 zones (Noll et al., 1996; Bali et al., 2012), suggesting that Mo isotopic composition of subduced  
57 material can be recorded in the mantle (Freytmuth et al., 2015). Supposing there are significant  
58 differences in  $\delta^{98}\text{Mo}$  and Mo concentration between the upper mantle, fresh oceanic crust,  
59 altered oceanic crust, and sediment, the Mo isotope system will be a powerful tool to trace the  
60 sources of magma and calculate the contribution proportion of each source. Bezaud et al. (2016)  
61 measured the Mo isotopic composition of Mid-Ocean Ridges Basalt (MORB) to establish the  
62 Mo isotopic composition of the depleted mantle (DM) as  $-0.21 \pm 0.02\%$ . Freymuth et al. (2015)  
63 analyzed the sediment and altered oceanic crust from ODP sites 801 and 802, ranging in  $\delta^{98}\text{Mo}$   
64 from  $-1.87$  to  $0.11\%$  with an average value of  $-0.50\%$  and from  $-0.88$  to  $0.86\%$  with an average  
65 value of  $-0.03\%$ , respectively. Moreover, the Mo concentrations of the upper mantle, altered  
66 oceanic crust, and sediment are  $1.65 \mu\text{g g}^{-1}$ ,  $0.35 \mu\text{g g}^{-1}$ , and  $4.03 \mu\text{g g}^{-1}$ , respectively. The  
67 significant differences in Mo isotopic composition and Mo concentrations between mantle and  
68 crust indicate that Mo isotope has excellent potential to trace subducted processes.

69 Due to the natural advantage of the Mo isotope, many investigations focused on oceanic basalt  
70 using Mo isotopic system to trace the subducted processes (König et al., 2016; Willbold and  
71 Elliott, 2017; Zhang et al., 2020; Li et al., 2021). However, the current Mo isotope data of  
72 intraplate basalt is very limited, and it is debated for using Mo isotope to trace recycled



73 materials for intraplate basalt. Here, we measured a systematic Mo isotopic composition of a  
74 set of well-characterized basalt samples from Keluo and Halaha-Chaoer of Northeast China.  
75 Samples from Keluo display typical EM I characteristics, while samples from Halaha-Chaoer  
76 have the radiogenic isotopic signatures of the focal zone (FOZO) (Hart et al., 1992; Stracke et  
77 al., 2005). Thus, the samples allow us to use the Mo isotope to assess the contributions of  
78 recycled crustal materials to the mantle.

## 79 **2 Sample**

80 Northeast China was set between the Siberian Craton and the North China Craton, and  
81 considered as the eastern segment of the Central Asian Orogenic Belt (Chen et al., 2007; Zhang  
82 et al., 1995). The plate suffered the closure of the Paleo-Asian Ocean and the amalgamation of  
83 many microcontinent (Senger et al., 1993). Intraplate basaltic rocks in North China were formed  
84 in the Cenozoic (Zhang et al., 1995; Zou et al., 2003). The Halaha-Chaoer and Keluo volcanic  
85 fields were set at the Great Xing'an Mountains and the North of Songliao Basin (Zhang, 1992).  
86 Fourteen samples were collected from two volcanic fields, including Halaha-Chaoer (2.0 Ma)  
87 and Keluo (9.6–0.11 Ma), of Northeast China. These samples come from many works which  
88 studied the evolution of volcanoes. Therefore, the geochemical and isotopic compositions of  
89 more samples can be found in previous works (Sun et al., 2014, 2017), and **particle** samples are  
90 measured in this study (Table S1). Here, we just **provided** a brief description of these samples.  
91 The Mo concentration and MgO content of Halaha-Chaoer lavas ranged from 0.96 to 1.18  $\mu\text{g}$   
92  $\text{g}^{-1}$  with an average value of  $1.05 \pm 0.18 \mu\text{g g}^{-1}$  and from 7.93 to 12.13 wt. %, suggesting  
93 significant crystallization. And the Sr-Nd isotopic ratios of Halaha-Chaoer samples is similar  
94 to the FOZO component (initial  $^{87}\text{Sr}/^{86}\text{Sr} = 0.70354 - 0.7037$  and  $^{143}\text{Nd}/^{144}\text{Nd} = 0.51291 -$   
95  $0.5193$ ). On the contrary, the Keluo lavas are characterized by a high Mo concentration of 1.21-  
96  $2.63 \mu\text{g g}^{-1}$  and **same** MgO content (7.67 to 11.28 wt.%) in relation to Halaha-Chaoer lavas. The  
97 Sr-Nd isotopic compositions of the group sample are close to the EMI component ( $^{87}\text{Sr}/^{86}\text{Sr} =$   
98  $0.70503-0.70541$  and  $^{143}\text{Nd}/^{144}\text{Nd} = 0.51235-0.51246$ ) (Table 1). The significant chemical  
99 difference between Keluo and Halaha-Chaoer provided a great opportunity to check the ability  
100 of Mo isotope to trace the contributions of recycled crustal materials to the mantle.

## 101 **3 Analytical methods**



102 3.1 Major and trace element analyses

103 The major and trace elements were conducted following the analytical procedures described by  
104 Qi et al. (2000). An Inductively Coupled Plasma-Atomic Emission Spectrometer measured the  
105 major elemental compositions. The loess on ignition (LOI) was analyzed after the samples were  
106 heated for 30 min at 980°C. The samples were digested using a mixture of HF-HNO<sub>3</sub>-HF. The  
107 clean solutions were diluted to determine the trace element composition on an Inductively  
108 Coupled Plasma-Mass Spectrometry (ELEMENT XR, Thermo, Germany). The reproducibility  
109 for trace elements is better than 10% (2SD). All uncertainties of the major element are better  
110 than 2% (2SE).

111 3.3 Mo-Sr-Nd isotopic analyses

112 The Mo isotopic measurement of all samples was carried out at the State Key Laboratory of  
113 Isotope Geochemistry, Guangzhou Institute of Geochemistry, Chinese Academy of Sciences.  
114 Detailed processes for digestion, chemical purification and isotopic analysis can be found in Li  
115 et al. (2014) and Zhao et al. (2017). Sr-Nd isotopes were determined at the China University of  
116 Geosciences, Beijing, and a more analyzed method can be found in Xu et al. (2021).

117 The samples were digested using a 7 ml PFA beaker. Approximately 50-100 mg of powdered  
118 samples were mixed with 2ml of concentrated HF and 1 ml of concentrated HNO<sub>3</sub>; the mixtures  
119 were heated at 185±5°C for 36 h. The dry residues were dissolved into Aqua regia to digest  
120 samples completely. The fully dissolved samples were evaporated to dryness and then  
121 redissolved in 5ml 1.5 M HNO<sub>3</sub>.

122 The digested samples containing 100-200 ng Mo were spiked by the double spikes (<sup>100</sup>Mo-<sup>97</sup>Mo)  
123 in a 15ml PFA beaker to correct the potential Mo isotopic fractionation of chemical purification  
124 and measurement. The spiked samples were dried slowly at 90°C to allow the equilibration  
125 between the samples and double spike and then redissolved in 4ml mixed acid of 0.1 M HF and  
126 1M HCl. The sample solutions were loaded to prepare BPHA resin that was clean with 6 M  
127 HCl and MQ. The matrix elements were washed out of columns by 0.1M HF-1M HCl. The  
128 fraction of Mo was collected by 6 M HF-1M HCl in a 15ml PFA beaker. The eluted solutions  
129 were evaporated to dry at 130°C. Concentrated HNO<sub>3</sub> and H<sub>2</sub>O<sub>2</sub> were used to remove residual  
130 organic materials from the resin. The total blank of the procedure is 0.5ng which can be



131 neglected in relation to the loaded sample. Sr and Nd were purified from matrix elements using  
132 AG50W-X12 (200-400 mesh) resin and LN resin, respectively.

133 Molybdenum isotopic measurements were performed with a Multi-collector inductively  
134 coupled plasma mass spectrometer (MC-ICP-MS, Neptune Plus, ThermoFisher). Sample  
135 solutions were introduced into the plasma by an Aridus II desolvator system. The signal  
136 sensitivity of  $^{95}\text{Mo}$  was  $\geq 190 \text{ V } \mu\text{g}^{-1} \text{ mL}$ , and the blank signal of  $^{95}\text{Mo}$  was less than 4 mV. The  
137 solutions and samples were dissolved at 0.5 M  $\text{HNO}_3$  and diluted to  $30 \text{ ng mL}^{-1}$  for measuring  
138 Mo isotopes. All Mo isotope analyses were carried out on the low mass resolution mode  
139 ( $\Delta M/M < 3000$ ). The on-peak instrument and acid matrix blank were determined by measuring  
140 **1.5M  $\text{HNO}_3$**  before each sample and standard to subtract from the signal intensities. Every 5  
141 samples were bracketed by a spiked SRM 3134 with  $30 \text{ ng mL}^{-1}$  to normalize the Mo isotope  
142 ratio of samples. More detailed parameters for the Mo isotopes measurements have been listed  
143 in **previous work**. The Mo isotopic composition is expressed relative to NIST SRM 3134 as  
144 delta ( $\delta$ ) notation:  $\delta^{98}\text{Mo} = \left( \frac{^{98}\text{Mo}/^{95}\text{Mo}}{(^{98}\text{Mo}/^{95}\text{Mo})_{\text{NIST SRM 3134}}} - 1 \right) \times 1000$ . Four  
145 geological reference materials (NOD-A-1, NOD-P-1, BHVO-2 and BCR-2) from USGS were  
146 digested, purified and measured with our samples. The Mo isotopic compositions re  $-0.79 \pm 0.04\%$   
147 (2SD, n=5) for NOD-A-1,  $-0.87 \pm 0.05\%$  (2SD, n=5) for NOD-P-1,  $-0.05 \pm 0.05\%$  (2SD, n=5)  
148 for BHVO-2 and  $-0.06 \pm 0.04\%$  (2SD, n=5) for BCR-2, similar to previous works (**Skierszkan**  
149 **et al., 2015; Li et al., 2016; Willbold et al., 2016**).

150 For Sr and Nd isotopic composition, the mass fractionations of chemical purification and  
151 instrument were calibrated with  $^{88}\text{Sr}/^{86}\text{Sr} = 8.375209$  and  $^{146}\text{Nd}/^{144}\text{Nd} = 0.7219$ . The long-term  
152 analysis gave  $0.710241 \pm 24$  for  $^{87}\text{Sr}/^{86}\text{Sr}$  of NIST SRM 987 in the lab and  $0.512434 \pm 29$  for  
153  $^{143}\text{Nd}/^{144}\text{Nd}$  of Alfa Aesar Nd. The Sr and Nd isotopic composition of BHVO-2 and BCR-2  
154 determined **in this study** are consistent with previous values (Li et al., 2012).

#### 155 **4. Results**

156 The  $\delta^{95}\text{Mo}$  values of Northeast China lavas vary from  $-0.41\%$  to  $-0.12\%$  (Table 1). The sample  
157 from Keluo varied from  $-0.41$  to  $-0.23\%$  in  $\delta^{95}\text{Mo}$  with an average of  $-0.34 \pm 0.10\%$  (2SD),  
158 higher than the sediments ( $-0.50\%$ ) and lighter than the altered oceanic basalts ( $0.03\%$ )  
159 (Freyruth et al., 2015). The samples from Halaha-chaoer have **homogenous** Mo isotopic



160 composition, ranging from -0.12 to -0.18‰ with an average of  $-0.15 \pm 0.05\%$  (2SD), similar to  
161 the fresh MORB (-0.21‰, Chen et al., 2022). The Sr-Nd isotopes, major and trace elements  
162 composition were shown in Table 1 and Table S1.

## 163 5. Discussion

164 Given Mo isotope can be fractionated during a range of processes, it is necessary to carefully  
165 assess the processes that may have modified Mo isotopic composition of these samples, such  
166 as chemical weathering, assimilation of shallow continental crust, magmatic differentiation and  
167 partial melting. And then, we estimate the effects of recycled crustal materials on the Mo  
168 isotopic variation of the samples.

### 169 5.1 Chemical weathering and Assimilation of crustal materials on Mo isotope

170 Mo isotopes were fractionated during chemical weathering, and lighter isotopes adsorbed onto  
171 secondary minerals so that the weathered residual is lighter in  $\delta^{95}\text{Mo}$  than fresh igneous rocks  
172 (Greaney et al., 2021). However, the samples do not observe secondary minerals (Sun et al.,  
173 2014). Moreover, the loss on ignition (LOI) ranging from 0.00 to 1.28 does not display a  
174 negative correlation (Fig. 1). Both pieces of evidences imply that the observed Mo isotopic  
175 variation cannot be attributed to chemical weathering.

176 These basalts erupted through the continental crust, which is about 40km. The Mo content of  
177 these basalts varies from 1.28 to 2.82  $\mu\text{g g}^{-1}$  with an average value of 1.83  $\mu\text{g g}^{-1}$ , higher than  
178 the average Mo concentration of continental crust is 0.8  $\mu\text{g g}^{-1}$  (Rudnick and Gao, 2014). The  
179 upper continental crust is significantly different in  $\delta^{95}\text{Mo}$  from the basalt (Yang et al., 2017;  
180 Greaney et al., 2020). Hence, we must consider that crustal materials may modify the Mo  
181 isotopic composition of these basalts. For the scenario, a negative correlation between Mo  
182 content and  $\delta^{95}\text{Mo}$  were expected because of the heavy Mo isotopic composition of the  
183 continental crust. However, we do not observe the relationship (Fig. 2). On the other hand,  
184 binary mixing calculation implies that the Mo isotopic variation cannot be explain by binary  
185 mixing between continental crust and mantle melt, because of unrealistic Mo concentration  
186 ratio (Fig. 2). Hence, Assimilation of crustal materials is not the main process that led to the  
187 Mo isotopic variation in these basalts.

188



189 **5.2 The effect of fractional crystallization on Mo isotope**

190 The Mo isotopic composition of basalts from the Kos Island arc system ranged from 0.3 to  
191 0.6‰, indicating that Mo isotopes are fractionated during the fractional crystallization of  
192 hornblende and biotite (Voegelin et al., 2014). ~~However, Bezdard et al. (2016) measured the Mo~~  
193 ~~isotopic composition of MORB from the Pacific-Antarctic ridge and the Mohns-Knipovich~~  
194 ~~ridge. The  $\delta^{95}\text{Mo}$  did not show correlations with MgO that indicated magma differentiation,~~  
195 ~~suggesting that Mo isotopic fractionation is insignificant during the fractional crystallization of~~  
196 ~~MORB magma. Recently, Chen et al. (2022) analyzed some MORB glass to constrain the Mo~~  
197 ~~isotopic composition of the upper mantle. The correlations between  $\delta^{95}\text{Mo}$  and magmatic~~  
198 ~~differentiation indicators were not observed, inferring that Mo isotopes were not fractionated~~  
199 ~~during magmatic differentiation (Chen et al., 2022).~~ For our samples studied here, the  
200 significant variation of MgO contents (from 6.9 to 13.0%) implies that fractional crystallization  
201 plays an essential role in changing the chemical composition of basalts. As shown in Fig.3a,  
202 Mo concentration in basalt from Northeast China correlates well with MgO; the positive  
203 correlation indicates that Mo is a likely incompatible element enriched in solid phases during  
204 melt evolution. The unclear correlations between  $\delta^{98}\text{Mo}$  and MgO (Fig. 3b) and Mo (Fig. 2)  
205 content suggest that the effect of fractional crystallization on the  $\delta^{95}\text{Mo}$  of basalts is likely  
206 insignificant. The observation is similar to the previous inference (Bezard et al., 2016 and Chen  
207 et al., 2022) but different from the conclusions from Voegelin et al. (2014). Thus, the  $\delta^{98}\text{Mo}$   
208 variation cannot be explained simply to fractional crystallization and may be caused by partial  
209 melting.

210 **5.3 The effect of partial melting on Mo isotopic composition of basalts**

211 Since ~~sodium~~ is a moderately incompatible element at melting the with highest concentration  
212 at started melting, the Na concentration of melt decreases with the growth of melting degree.  
213 Hence,  $\text{Na}_{8,0}$  indicates the degree of partial melting without the effect of fractional  
214 crystallization (Klein and Langmuir, 1987). Bezard et al. (2016) observed the absence of  
215 correlation between  $\delta^{95}\text{Mo}$  and  $\text{Na}_{8,0}$ , explaining the trend that Mo isotopes are not fractionated  
216 during mantle melting. Since La is more incompatible than the heavy rare earth element Yb  
217 during the partial melting of mantle,  $(\text{La}/\text{Yb})_N$  ratio is sensitive to the degree of partial melting.





218 Liang et al. (2017) observe broad correlations between  $\delta^{98}\text{Mo}$  and  $(\text{La}/\text{Yb})_N$  in ocean island  
219 basalts (OIB), suggesting a significant effect of melting on the Mo isotopic variations. The  
220 conclusion is contrary to Bezarid et al. (2016). However, for our samples, we did not observe  
221 the clear relationships between  $\delta^{98}\text{Mo}$  and  $\text{Na}_{8.0}$  (Fig. 4a) as well as  $(\text{La}/\text{Yb})_N$  (Fig. 4b). In  
222 addition, McCoy-West et al. (2019) accessed the Mo isotopic behaviors using a non-modal  
223 batch melting model and inferred that Mo isotopes were significantly fractionated during  
224 mantle partial melting that melt is heavier in  $\delta^{98}\text{Mo}$  than the residue. The fractionation was  
225 driven from as that Mo (VI) with heavier isotope is more incompatible than Mo (IV) (Leitzke  
226 et al., 2017). However, the samples ( $-0.33\pm 0.10\%$ ) produced by the high degree of partial  
227 melting have lighter Mo isotopic composition than the samples with a low degree ( $-$   
228  $0.15\pm 0.05\%$ ), **contrary to the prediction trend by the previous model** (Fig. 4, McCoy-West et  
229 al., 2019). Therefore, the evidences suggested that partial melting cannot explain the  $\delta^{98}\text{Mo}$   
230 variation of these basalts.

#### 231 **5.4 Molybdenum isotopic variation induced by crustal recycling**

232 The above discussions show that the Mo isotopic variation for these basalts cannot be explained  
233 by shallow-level processes, fractional crystallization and partial melting. Radiogenic isotopes,  
234 such as Nd and Sr, usually are used to reflect heterogeneous sources. The significant variations  
235 for  $^{143}\text{Nd}/^{144}\text{Nd}$  and  $\delta^{98}\text{Mo}$  imply that there are more than two components at least for the mantle  
236 sources of these basalts (Fig. 5). In the following, we will discuss the mechanisms that may be  
237 responsible for the processes of mantle enrichment and ~~abnormal~~ Mo isotopic ~~composition~~.

238  
239 Sediments could be recycled into the mantle with subducted slabs (Stracke et al., 2003). The  
240  $\delta^{98}\text{Mo}$  of subducting sediments ~~varied~~ from  $-1.87$  to  $0.11\%$  with an average value of  $-0.50 \pm$   
241  $0.27\%$  (2SE,  $n=16$ , Freymuth et al., 2015). Since Mo is a highly incompatible element and  
242 lighter isotopes were preserved in the residual ~~produced~~ during metamorphic dehydration  
243 (König et al., 2016), melts derived from recycled sediments should inherit the **light Mo isotopic**  
244 composition. Hence, the incorporation of recycled sediments into peridotite melting could be  
245 responsible the lighter Mo isotopic composition. The  $\delta^{98}\text{Mo}$  of basalt studied here ( $-0.30\%$ ) is  
246 lighter than fresh MORB ( $-0.21\%$ , **Chen et al., 2022**), and  $^{143}\text{Nd}/^{144}\text{Nd}$  is higher than sediment



247 (0.51228, Vervoort et al., 2011) and lighter than fresh MORB (0.513074, Gale et al., 2013),  
248 suggesting that sediment is one of source for these basalts from Keluo. On the other hand, Th/U  
249 ratio is not fractionated significantly during magmatic processes as Th and U are incompatible  
250 elements. Both elements can be fractionated during fluid processes because of the higher  
251 mobility of U than Th (Hawkesworth et al., 1997; Bali et al., 2009; Ling et al., 2011). Thus,  
252 there is a significant difference in the Th/U ratio between fresh MORB (3.54, Gale et al., 2013)  
253 and sediment (6.64, Vervoort et al., 2011). Reasonability, the ratio is usually used as an indicator  
254 of distinguishing the mantle sources (Sun et al., 2020). The Th/U ratio of our basalts (4.94 to  
255 6.12) falls between sediment and fresh MORB. The observation indicates that sediment may  
256 play an essential role in forming these basalts. It is noteworthy that there is not expected positive  
257 correlation between  $\delta^{98}\text{Mo}$  and Th/U ratio (Fig. 5b), implying other sources for the basalts.  
258 Significant Mo isotopic fractionation is observed during seawater alteration (Freyduth et al.,  
259 2015), suggesting that altered oceanic crust (-0.02‰) is heavier  $\delta^{98}\text{Mo}$  than fresh ocean crust  
260 (-0.21‰). Thus, The incorporation of altered oceanic crust during the particle melting of mantle  
261 could produce melts with significant various Mo isotopic composition. Due to the mobility  
262 difference between Ba and Th (Weaver et al., 1986), the Ba/Th ratio of the altered oceanic crust  
263 will be increased with the growing extent of low-temperature hydrothermal alteration (Kelley  
264 et al., 2003). Furthermore, the ratio will not be changed during slab dehydration (Kogiso et al.,  
265 1997; Kessel et al., 2005). Hence, the ratio is used to trace the incorporation of altered oceanic  
266 crust in the mantle (Sun et al., 2020). The Ba/Th ratios of these basalts range from 147 to 239,  
267 higher than sediment and fresh MORB and similar to altered oceanic crust (Fig. 5c), indicating  
268 the incorporation of altered oceanic crust into the source region of these basalts.  
269 Therefore, recycled sediment and altered both have contributed to the basalt of Keluo produced  
270 in Northeast China. The materials may have come from the westward subduction of the Pacific  
271 plate (Tang et al., 2014). The contribution of the fresh oceanic crust is insignificant because of  
272 the low Mo concentration. Mixing of melts produced from recycled sediment with the  
273 contribution of mantle peridotites derived the variation of Mo isotopic composition in the  
274 basalts.

## 275 6. Conclusion



276 This work suggests that the basalt from Keluo displays heterogenous Mo isotopic composition  
277 and is heavier Mo isotopic compositions than the upper mantle. At the same time, the sample  
278 from Halaha-Chaoer is homogenous in  $\delta^{98}\text{Mo}$ , similar to the upper mantle. The isotopic  
279 variation was explained by adding sediment and altered oceanic basalt with subducted oceanic  
280 slabs into mantle sources. Therefore, the Mo isotope is a powerful tool in investigating the  
281 effect of crustal recycling on mantle-derived magmas to understand recycling materials' roles  
282 in mantle heterogeneity.

283

#### 284 **Acknowledgements**

285 We are grateful to Jie Li and FanHuang Li for analytical assistance, as well as Yang Sun and  
286 Yongwei Zhao for sample collection. The work was supported by the National Key Research  
287 and Development Program of China (2017YFC0703201), the National Science and Technology  
288 Major Project of the Ministry of Science and Technology of China (2016ZX05014001), the  
289 Strategic Priority Research Program of the Chinese Academy of Sciences (XDA14010201), the  
290 National Natural Science Foundation of China (41530347, 41872225)

#### 291 **Reference**

- 292 Bali E., Audetat A. and Keppler H. (2009) Mobility of U and Th in subduction zone fluids-A  
293 synthetic fluid inclusion study. *Geochim. Cosmochim. Acta* 73(13), A80.
- 294 Bali, E., Keppler, H., Audetat, A., 2012. The mobility of W and Mo in subduction zone fluids and  
295 the Mo–W–Th–U systematics of island arc magmas. *Earth Planet. Sci. Lett.* 351–352, 195–  
296 207.
- 297 Bezard R., Fischer-Godde M., Hamelin C., Brennecka G. A. and Kleine T. (2016) The effects of  
298 magmatic processes and crustal recycling on the molybdenum stable isotopic composition of  
299 Mid-Ocean Ridge Basalts. *Earth Planet. Sci. Lett.* 453, 171–181.
- 300 C.J. Hawkesworth, S.P. Turner, F. McDermott, D.W. Peate, P. van Calsteren, U-Th isotopes in arc  
301 magmas implications for element transfer from the subducted crust, *Science* 276 (1997) 551-  
302 555.
- 303 Castillo P. R. (2015) The recycling of marine carbonates and sources of HIMU and FOZO ocean  
304 island basalts. *Lithos* 216–217, 254–263.

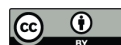

- 305 Chen, S., Sun, P., Niu, Y., Guo, P., Elliott, T., Hin, R.C., 2022. Molybdenum isotope systematics of  
306 lavas from the East Pacific Rise: constraints on the source of enriched mid-ocean ridge basalt.  
307 Earth Planet. Sci. Lett. 578, 117283.  
308 Commun. 12, 6015.
- 309 Freymuth H., Vils F., Willbold M., Taylor R. N. and Elliott T. (2015) Molybdenum mobility and  
310 isotopic fractionation during subduction at the Mariana arc. Earth Planet. Sci. Lett. 432, 176–  
311 186.
- 312 Gale A., Dalton C. A., Langmuir C. H., Su Y. and Schilling J.-G. (2013) The mean composition of  
313 ocean ridge basalts. Geochem. Geophys. Geosyst. 14, 489–518.
- 314 Greaney, A.T., Rudnick, R.L., Romaniello, S.J., Johnson, A.C., Gaschnig, R.M., Anbar, A.D., 2020.  
315 Molybdenum isotope fractionation in glacial diamictites tracks the onset of oxidative  
316 weathering of the continental crust. Earth Planet. Sci. Lett. 534, 116083.
- 317 Hart S. R., Hauri E. H., Oschmann L. A. and Whitehead J. A. (1992) Mantle plumes and  
318 entrainment-Isotopic evidence. Science 256, 517–520
- 319 Hofmann A. W. (1997) Mantle geochemistry: The message from oceanic volcanism. Nature 385,  
320 219–229.
- 321 Kelley K. A., Plank T., Ludden J. and Staudigel H. (2003) Composition of altered oceanic crust at  
322 ODP Sites 801 and 1149. Geochem. Geophys. Geosyst. 4, 8910. [https://doi.org/  
323 10.1029/2002GC000435](https://doi.org/10.1029/2002GC000435)
- 324 Kessel R., Schmidt M. W., Ulmer P. and Pettko T. (2005) Trace element signature of subduction-  
325 zone fluids, melts and supercritical liquids at 120–180 km depth. Nature 437, 724–727.
- 326 Klein E. and Langmuir C. H. (1987) Global correlations of ocean ridge basalt chemistry with axial  
327 depth and crustal thickness. J. Geophys. Res. 92, 8089–8115
- 328 Kogiso T., Tatsumi Y. and Nakano S. (1997) Trace element transport during dehydration processes  
329 in the subducted oceanic crust: 1. Experiments and implications for the origin of ocean island  
330 basalts. Earth Planet. Sci. Lett. 148, 193–205.
- 331 König S., Wille M., Voegelin A. and Schoenberg R. (2016) Molybdenum isotope systematics in  
332 subduction zones. Earth Planet. Sci. Lett. 447, 95–102.
- 333 Leitzke F. P., Fonseca R. O. C., Sprungb P., Mallmann G., Lagosa M., Michelya L. T. and Münker



- 334 C. (2017) Redox dependent behaviour of molybdenum during magmatic processes in the  
335 terrestrial and lunar mantle: implications for the Mo/W of the bulk silicate Moon. *Earth Planet.*  
336 *Sci. Lett.* 474, 503–515.
- 337 Li C.-F., Li X.-H., Li Q.-L., Guo J.-H., Li X.-H. and Yang Y.-H. (2012) Rapid and precise  
338 determination of Sr and Nd isotopic ratios in geological samples from the same filament  
339 loading by thermal ionization mass spectrometry employing a single-step separation scheme.  
340 *Anal. Chim. Acta* 727, 54–60.
- 341 Li H. Y., Zhao R. P., Li J., Tamura Y., Spencer C., Stern R. J., Ryan J. G. and Xu Y. G. (2021)  
342 Molybdenum isotopes unmask slab dehydration and melting beneath the Mariana arc. *Nat.*  
343 *Arc). Lithos* 190–191, 440–448.
- 344 Li J., Liang X.R., Zhong L.F., Wang X.C., Ren Z.Y., Sun S.L., Zhang Z.F. and Xu J.F. (2014).  
345 Measurement of the isotopic composition of molybdenum in geological samples by MC-ICP-  
346 MS using a novel chromatographic extraction technique. *Geostand. Geoanal. Res.* 38, 345–  
347 354,
- 348 Li, J., Liang, X.-R., Zhong, X.-C., Wang, Z.-Y., Ren, S.-L., Sun, Z.-F., Zhang, J.-F., Xu, J.-F., 2014.  
349 Measurement of the isotopic composition of molybdenum in geological samples by MC-IC-  
350 MS using a novel chromatographic extraction technique. *Geostand. Geoanal. Res.* 38 (3), 345–  
351 354.
- 352 Liang Y. H., Halliday A. N., Siebert C., Fitton J. G., Burton K. W., Wang K. L. and Harvey J. (2017)  
353 Molybdenum isotope fractionation in the mantle. *Geochim. Cosmochim. Acta* 199, 91–111.
- 354 Ling M. X., Wang F. Y., Ding X., Zhou J. B. and Sun W. D. (2011) Different origins of adakites  
355 from the Dabie Mountains and the Lower Yangtze River Belt, eastern China: geochemical  
356 constraints. *Int. Geol. Rev.* 53(5–6), 727–740.
- 357 McCoy-West A. J., Chowdhury P., Burton K. W., Sossi P., Nowell G. M., Fitton J. G., Kerr A. C.,  
358 Cawood P. A. and Williams H. M. (2019) Extensive crustal extraction in Earth's early history  
359 inferred from molybdenum isotopes. *Nat. Geosci.* 12, 946–951
- 360 Noll, P.D., Newsom, H.E., Leeman, W.P., Ryan, J.G., 1996. The role of hydrothermal fluids in the  
361 production of subduction zone magmas: evidence from siderophile and chalcophile trace  
362 elements and boron. *Geochim. Cosmochim. Acta* 60, 587–611.

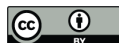

- 363 Perfit, M., Gust, D., Bence, A., Arculus, R., Taylor, S.R., 1980. Chemical characteristics of island-  
364 arc basalts – implications for mantle sources. *Chem. Geol.* 30 (3), 227–256.
- 365 Plank, T., Langmuir, C.H., 1998. The chemical composition of subducting sediment and its  
366 consequences for the crust and mantle. *Chem. Geol.* 145, 325–394
- 367 Qi, L., Hu, J., Gregoire, D.C., 2000. Determination of trace elements in granites by inductively  
368 coupled plasma–mass spectrometry. *Talanta* 51, 507–513.
- 369 Rudnick R. L. and Gao S. (2014) Composition of the continental crust. In *Treatise on Geochemistry*  
370 (eds. H. D. Holland and K. K. Turekian), second ed. Elsevier, Oxford, pp. 1–51.
- 371 Skierszkan EK, Amini M, Weis D (2015) A practical guide for the design and implementation of the  
372 double-spike technique for precise determination of molybdenum isotope compositions of  
373 environmental samples. *Anal Bioanal Chem* 407:1925–1935
- 374 Stracke A., Bizimis M. and Salters V. J. M. (2003) Recycling oceanic crust: Quantitative constraints.  
375 *Geochem. Geophys. Geosyst.* 4, 8003. <https://doi.org/10.1029/2001GC000223>, 3.
- 376 Stracke A., Hofmann A. W. and Hart S. R. (2005) FOZO, HIMU, and the rest of the mantle zoo.  
377 *Geochem. Geophys. Geosyst.* 6, Q05007. <https://doi.org/10.1029/2004GC000824>.
- 378 Sun Y., Teng F.-Z., Ying J.-F., Su B.-X., Hu Y., Fan Q.-C. and Zhou X.-H. (2017) Magnesium  
379 isotopic evidence for ancient subducted oceanic crust in LOMU-like potassium-rich volcanic  
380 rocks. *J. Geophys. Res. Solid Earth* 122, 7562–7572.
- 381 Sun Y., Ying J., Zhou X., Shao J. A., Chu Z. and Su B. (2014) Geochemistry of ultrapotassic volcanic  
382 rocks in Xiaogulihe NE China: implications for the role of ancient subducted sediments. *Lithos*  
383 208–209, 53–66.
- 384 Tang Y., Obayashi M., Niu F., Grand S. P., Chen Y. J., Kawakatsu H., Tanaka S., Ning J. and Ni J.  
385 F. (2014) Changbaishan volcanism in northeast China linked to subduction-induced mantle  
386 upwelling. *Nat. Geosci.* 7, 470–475.
- 387 Vervoort J. D., Plank T. and Prytulak J. (2011) The Hf–Nd isotopic composition of marine sediments.  
388 *Geochim. Cosmochim. Acta* 75, 5903–5926
- 389 Voegelin A. R., Pettke T., Greber N. D., von Niederhäusern B. and Nägler T. F. (2014) Magma  
390 differentiation fractionates Mo isotope ratios: evidence from the Kos Plateau Tuff (Aegean  
391 Willbold M. and Elliott T. (2017) Molybdenum isotope variations in magmatic rocks. *Chem. Geol.*



- 392 449, 253–268.
- 393 Willbold M., Hibbert K., Lai Y. J., Freymuth H., Hin R. C., Coath C., Vils F. and Elliott T. (2016)
- 394 High-precision mass-dependent molybdenum isotope variations in magmatic rocks determined
- 395 by double-spike MC-ICP-MS. *Geostand. Geoanal. Res.* 40, 389–403.
- 396 Xu L.-J., Liu S.-A. and Li S. (2021) Zinc isotopic behavior of mafic rocks during continental deep
- 397 subduction. *Geosci. Front.* 12(5) 101182.
- 398 Yang J., Barling J., Siebert C., Fietzke J., Stephens E. and Halliday A. N. (2017) The molybdenum
- 399 isotopic compositions of I-, S and A-type granitic suites. *Geochim. Cosmochim. Acta* 205,
- 400 168–186.
- 401 Zhang Y., Yuan C., Sun M., Li J., Long X., Jiang Y. and Huang Z. (2020) Molybdenum and boron
- 402 isotopic evidence for carbon recycling via carbonate dissolution in subduction zones. *Geochim.*
- 403 *Cosmochim. Acta* 278, 340–352.
- 404 Zhao, P.-P., Li J., Zhang L., Wang Z.-B., Kong D.-X., Ma J.-L., Wei G.-J., Xu J.-F.. (2015)
- 405 Molybdenum mass fractions and isotopic compositions of international geological reference
- 406 materials. *Geostand. Geoanal. Res.* 40, 217–226.
- 407 Zindler A. and Hart S. (1986) Chemical geodynamics. *Annu. Rev. Earth Planet. Sci.* 14, 493–571.
- 408



Table 1 Molybdenum isotopic composition of Northeast China basalt and geological reference materials

| Sample                         | Mo( $\mu\text{g g}^{-1}$ ) | MgO(%) | Na <sub>8.0</sub> | LOI  | Ce/Pb | Th/U | Ba/Th | (La/Yb) <sub>N</sub> | <sup>87</sup> Sr/ <sup>86</sup> Sr | <sup>143</sup> Nd/ <sup>144</sup> Nd | $\delta^{98}\text{Mo}$ | 2SD  |
|--------------------------------|----------------------------|--------|-------------------|------|-------|------|-------|----------------------|------------------------------------|--------------------------------------|------------------------|------|
| Keluo                          |                            |        |                   |      |       |      |       |                      |                                    |                                      |                        |      |
| DYS12-01                       | 2.42                       | 7.93   | 3.61              | 0.86 | 10.9  | 4.94 | 239   | 40.6                 | 0.70514                            | 0.51240                              | -0.38                  | 0.04 |
| DYS12-02                       | 2.45                       | 7.89   | 3.48              | 0.75 | 9.83  | 5.01 | 224   | 43.7                 | 0.70509                            | 0.51241                              | -0.36                  | 0.04 |
| XYS12-01                       | 2.63                       | 8.02   | 4.12              | 0.16 | 8.53  | 5.06 | 147   | 47.7                 | 0.70541                            | 0.51239                              | -0.41                  | 0.03 |
| XYS12-04                       | 2.53                       | 8.6    | 3.98              | 0.4  | 17.0  | 5.15 | 176   | 49.1                 | 0.70534                            | 0.51236                              | -0.38                  | 0.05 |
| JS12-01                        | 1.48                       | 11.28  | 4.16              | 1.28 | 15.4  | 5.46 | 227   | 39.8                 | 0.70511                            | 0.51242                              | -0.32                  | 0.04 |
| JS12-02                        | 1.52                       | 11.3   | 4.25              | 0.9  | 15.2  | 5.40 | 223   | 36.3                 | 0.70503                            | 0.51243                              | -0.38                  | 0.03 |
| DZS12-02                       | 1.46                       | 11.43  | 4.90              | 0.08 | 17.6  | 5.52 | 202   | 41.5                 | 0.70514                            | 0.51243                              | -0.23                  | 0.05 |
| DZS12-03                       | 1.32                       | 11.62  | 5.09              | 0.06 | 17.0  | 4.93 | 231   | 44.3                 | 0.70507                            | 0.51246                              | -0.34                  | 0.03 |
| XGS12-01                       | 1.73                       | 10.11  | 4.04              | 0.68 | 9.26  | 4.96 | 201   | 42.8                 | 0.70527                            | 0.51238                              | -0.28                  | 0.04 |
| XGS12-02                       | 1.88                       | 9.93   | 4.02              | 0.34 | 9.99  | 5.87 | 198   | 43.2                 | 0.70531                            | 0.51238                              | -0.29                  | 0.05 |
| HS12-01                        | 1.21                       | 12.13  | 4.96              | 0.12 | 15.4  | 6.32 | 231   | 35.2                 | 0.70514                            | 0.51244                              | -0.34                  | 0.04 |
| HS12-03                        | 1.38                       | 12.05  | 5.02              | 0.06 | 20.35 | 6.12 | 238   | 37.2                 | 0.70516                            | 0.51241                              | -0.32                  | 0.03 |
| Halaha-<br>Chaoer              |                            |        |                   |      |       |      |       |                      |                                    |                                      |                        |      |
| 07CH02                         | 1.04                       | 12.97  | 4.64              | 0.10 | 17.40 | 4.13 | 134   | 10.2                 | 0.70365                            | 0.51293                              | -0.15                  | 0.03 |
| 07AES07                        | 1.01                       | 10.88  | 4.27              | 0.30 | 12.14 | 4.09 | 105   | 10.3                 | 0.70371                            | 0.51291                              | -0.12                  | 0.03 |
| 07AES09                        | 0.96                       | 10.43  | 4.13              | 0.12 | 15.59 | 3.98 | 97    | 9.4                  | 0.70369                            | 0.51293                              | -0.18                  | 0.04 |
| 07AES16                        | 1.18                       | 12.5   | 4.82              | 0.11 | 20.34 | 4.44 | 109   | 9.9                  | 0.70354                            | 0.51293                              | -0.13                  | 0.05 |
| Geological reference materials |                            |        |                   |      |       |      |       |                      |                                    |                                      |                        |      |
| NOD-P-1                        |                            |        |                   |      |       |      |       |                      |                                    |                                      | -0.79                  | 0.04 |
| NOD-A-1                        |                            |        |                   |      |       |      |       |                      |                                    |                                      | -0.87                  | 0.05 |
| BCR-2                          |                            |        |                   |      |       |      |       |                      |                                    |                                      | -0.06                  | 0.04 |
| BHVO-2                         |                            |        |                   |      |       |      |       |                      |                                    |                                      | -0.05                  | 0.05 |



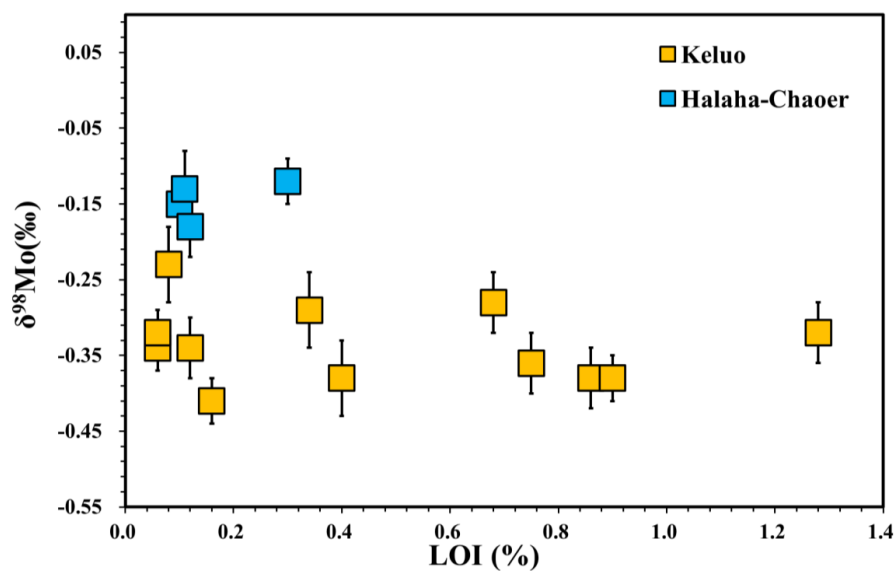

Fig.1  $\delta^{98}\text{Mo}$  versus loss on ignition (LOI) for Northeast China basalts. Data are reported in

Table 1

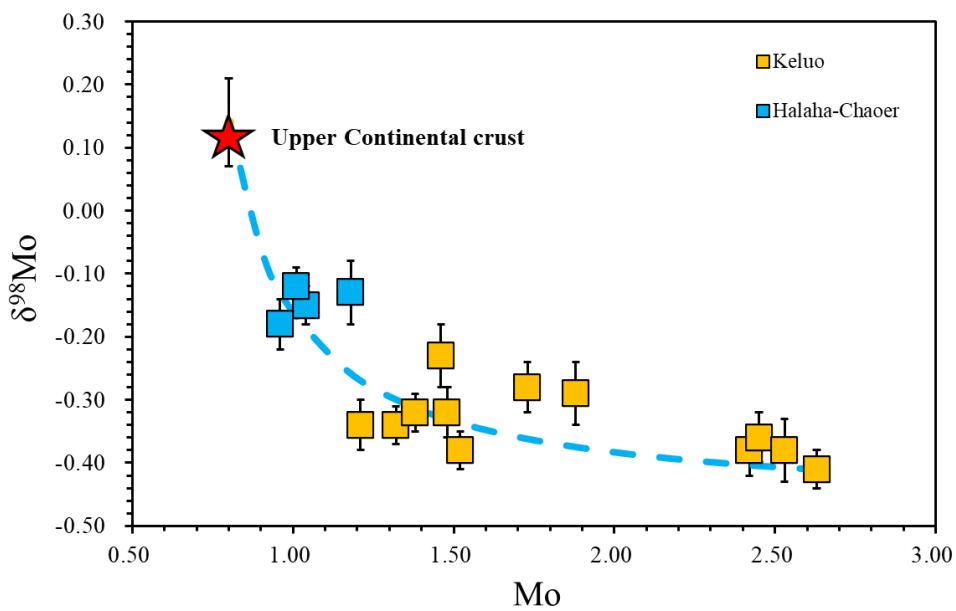

Fig.2 Plots of  $\delta^{98}\text{Mo}$  against Mo concentration for Northeast China basalts. The average Mo isotopic composition of upper continental crust is  $0.14 \pm 0.07\%$  (Yang et al., 2017). Data are reported in Table 1.

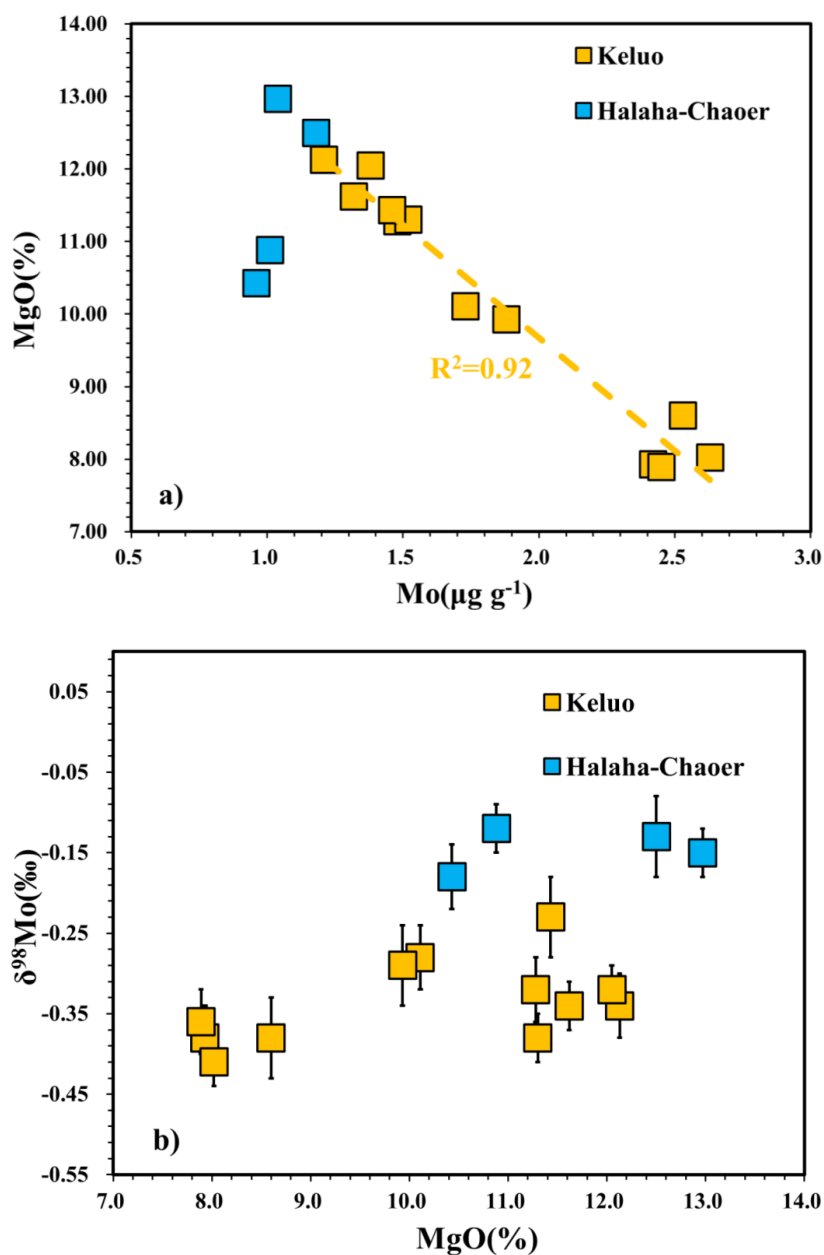

Fig. 3 Plot of  $\delta^{98}\text{Mo}$  against Mo concentration (a) and MgO content (b) for Northeast China basalts.

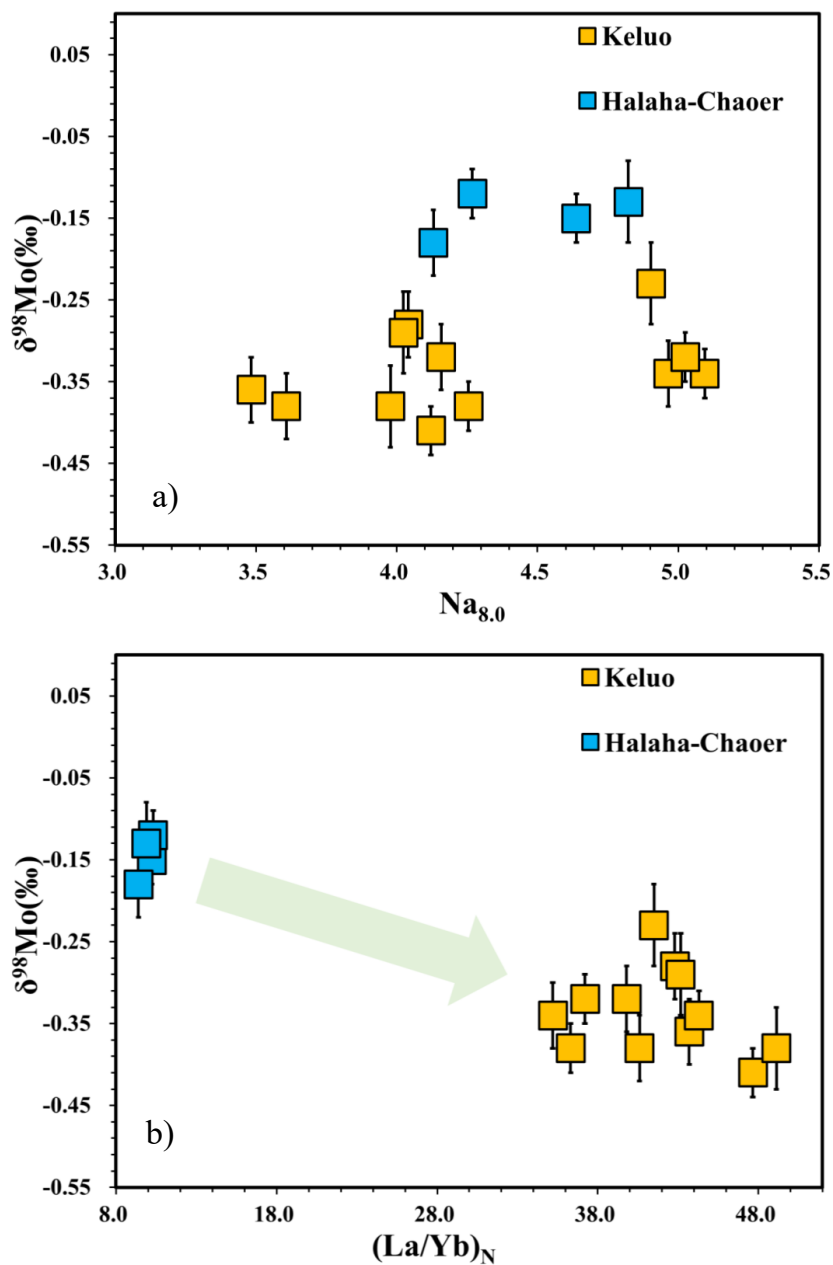

Fig. 4  $\delta^{98}\text{Mo}$  versus  $\text{Na}_{8,0}$  (a) and  $(\text{La}/\text{Yb})_N$  (b) for Northeast China basalts.  $\text{Na}_{8,0}$  was calculated by  $\text{Na}_{8,0} = \text{Na}_2\text{O} + (0.373 \times \text{MgO}) - 2.98$  (Klein and Langmuir, 1987). Data are reported in Table 1

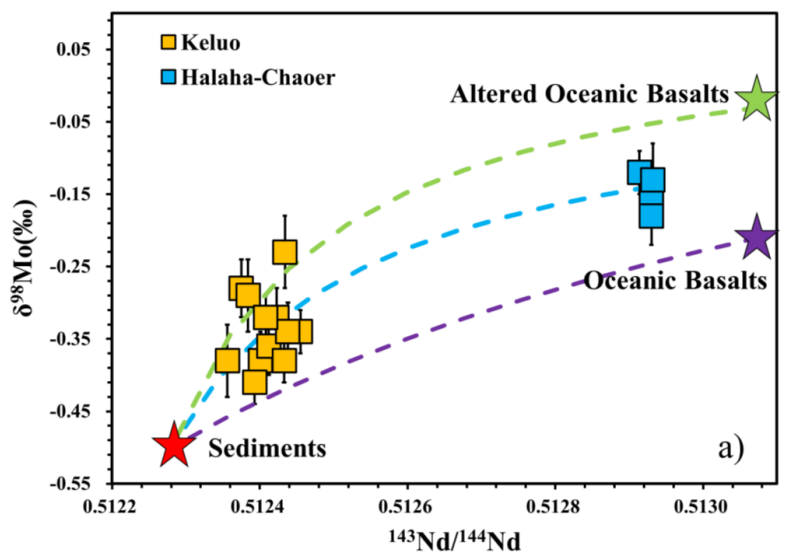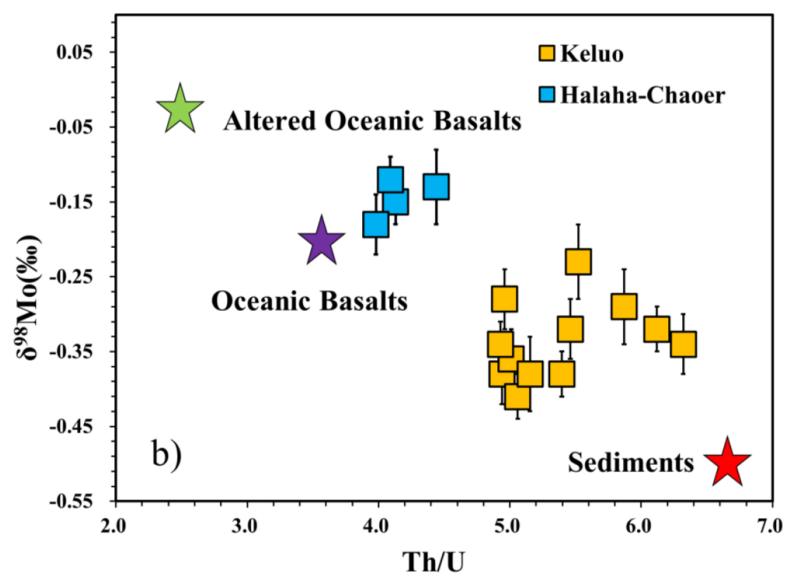

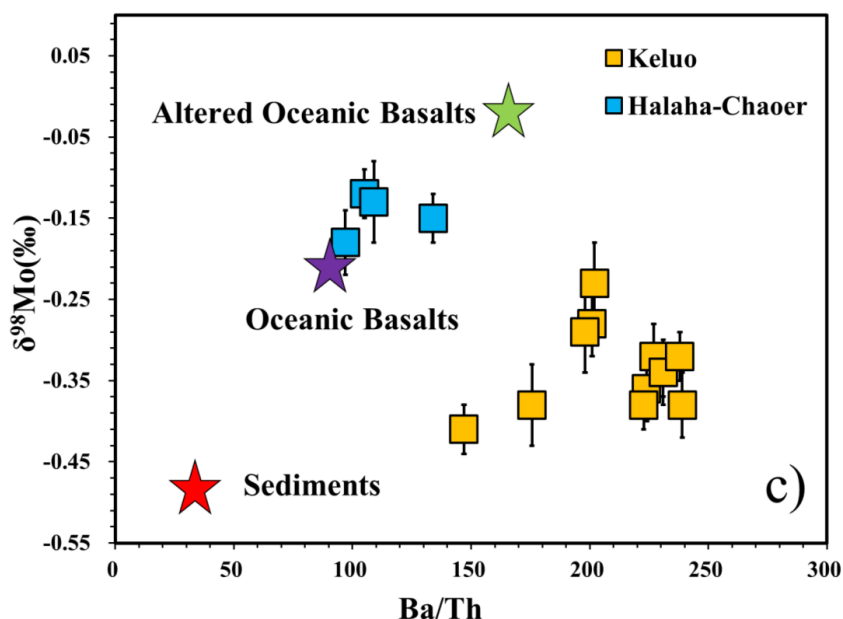

Fig. 5 Plot of  $\delta^{98}\text{Mo}$  against  $^{143}\text{Nd}/^{144}\text{Nd}$  (a), Th/U (b) and Ba/Th (C) for Northeast China basalts. The clay-rich sediments, highly altered oceanic crust, and unaltered oceanic basalts are represented by sediments from DSDP sites 294/295 (Vervoort et al., 2011), samples from the Bay of Islands ophiolite (Parendo et al., 2017), and the average E-MORB (Gale et al., 2013), respectively. The Nd isotopic ratio of clay-rich sediments is 0.512380 (Vervoort et al., 2011), whereas the Nd isotopic compositions of highly altered oceanic crust and unaltered oceanic basalts are assumed to be similar to that of the average E-MORB (0.513074) (Gale et al., 2013). The Th/U and Ba/Th ratios of these components are 6.64 and 35 (Vervoort et al., 2011), 2.5 and 166 (Parendo et al., 2017), and 3.54 and 92 (Gale et al., 2013), respectively.
